# Supplementary material for: Molten flux synthesis, single crystal X-ray structure and ion-exchange properties of the first polythiogallate, CsGaS3
Source: Royal Society of Chemistry journal article supplement (doi:10.1039/b207741h), 2002-01-01
Supplement: pxrd.pdf [file pxrd.pdf]

Relative intensity (arbitrary units)

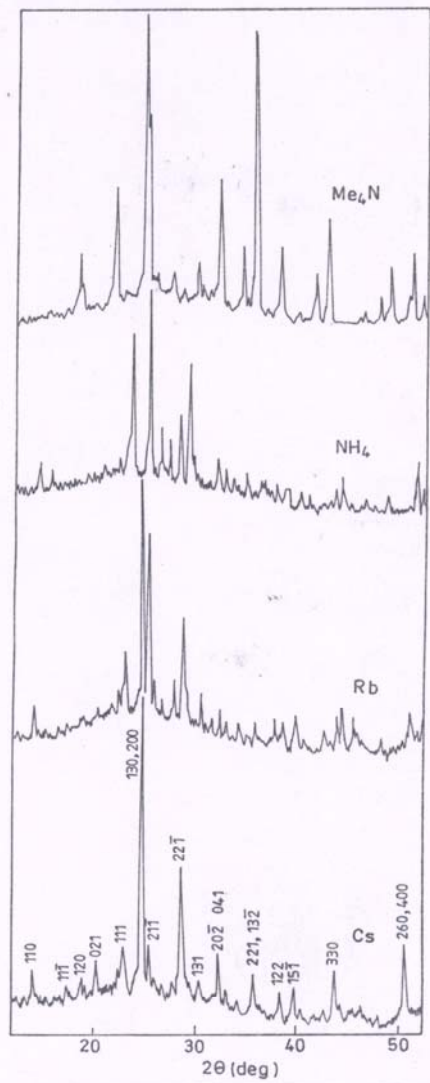

Powder XRD patterns of  $\text{AGaS}_3$  ( $A = \text{Cs}, \text{Rb}, \text{NH}_4$  and  $\text{Me}_4\text{N}$ ) compounds.
