# Supplementary figures and images for: Molten flux synthesis, single crystal X-ray structure and ion-exchange properties of the first polythiogallate, CsGaS3
Source: Royal Society of Chemistry journal article supplement (doi:10.1039/b207741h), 2002-01-01

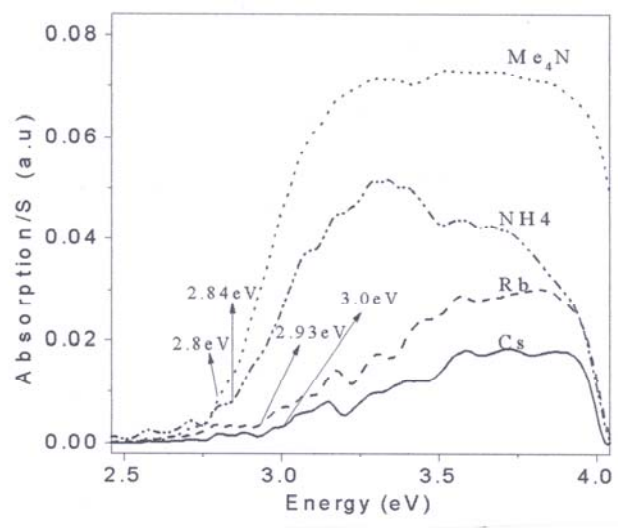

Optical absorption spectra of AGa<sub>3</sub> (A= Cs, Rb, NH<sub>4</sub> and Me<sub>4</sub>N) compounds

Supplement: drs.pdf [file drs.pdf]

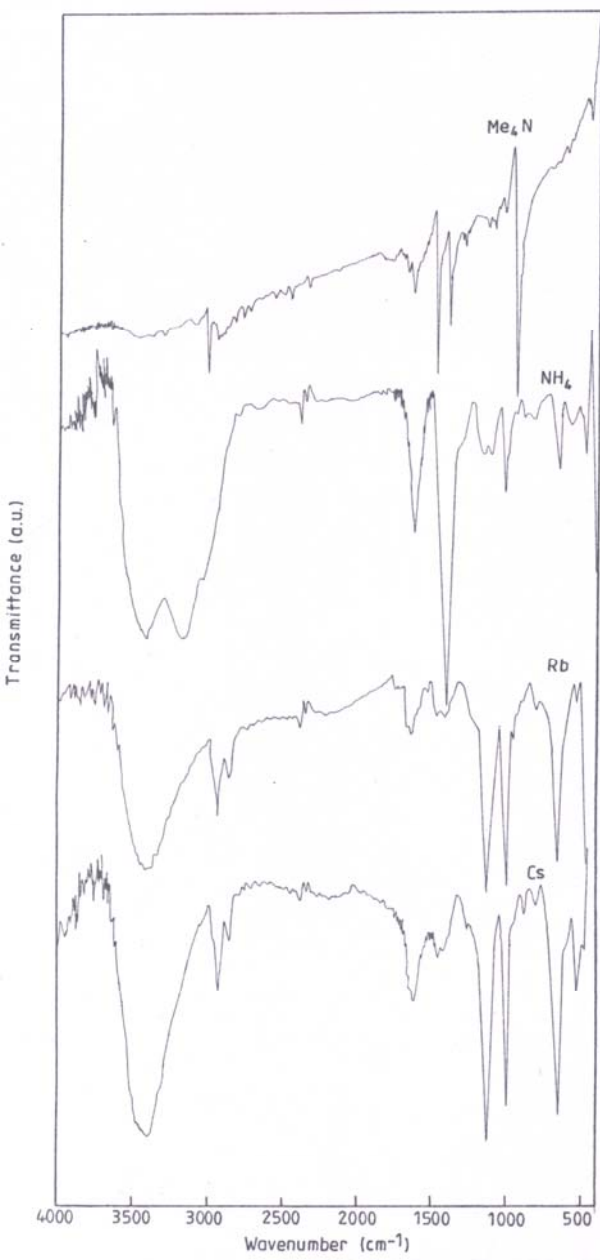

IR spectra of  $\text{AGaS}_3$  (A= Cs, Rb,  $\text{NH}_4$  and  $\text{Me}_4\text{N}$ ) compounds

Supplement: ir.pdf [file ir.pdf]

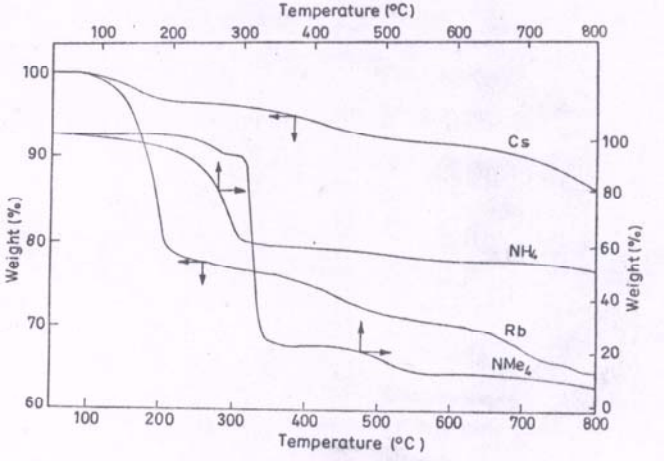

Thermogravimetric curves of  $AGaS_3$  (A = Cs, Rb,  $NH_4$  and  $Me_4N$ ) compounds.

Supplement: tga.pdf [file tga.pdf]
